# Supplementary material for: Long-lasting far-UVC persistent luminescence for solar-blind optical tagging
Source: Royal Society of Chemistry journal article supplement (doi:10.1039/d5qi00184f), 2025-01-01
Supplement: d5qi00184f1.pdf [file d5qi00184f1.pdf]

## Supporting Information

### **Long-lasting far-UVC persistent luminescence for solar-blind optical tagging**

Xihui Shan, Yi Zhang, Xulong Lv and Yanjie Liang\*

*Key Laboratory for Liquid-Solid Structure Evolution and Processing of Materials,  
Ministry of Education, Shandong University, Jinan 250061, P. R. China*

\*Corresponding author: Yanjie Liang

E-mail: [yanjie.liang@sdu.edu.cn](mailto:yanjie.liang@sdu.edu.cn)

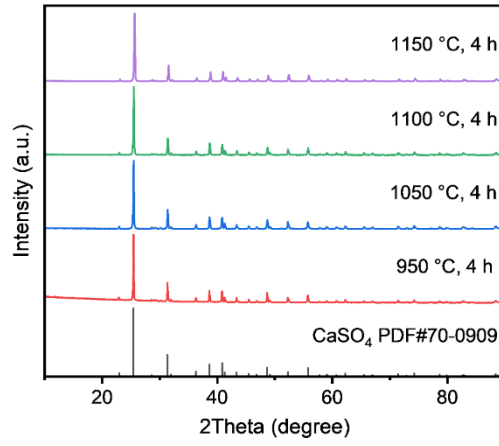

**Fig. S1** XRD patterns of the CaSO<sub>4</sub>:1%Pr<sup>3+</sup> phosphor sintered at different temperatures from 950 to 1150 °C (without pre-firing).

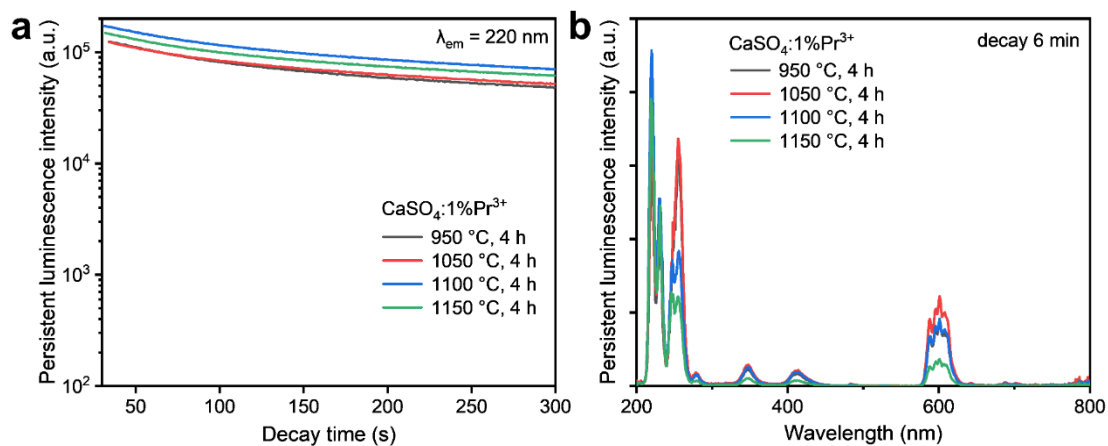

**Fig. S2** (a) Far-UVC persistent luminescence decay curves of the  $\text{CaSO}_4:1\%\text{Pr}^{3+}$  phosphor sintered at different temperatures (without pre-firing) monitored at 220 nm after irradiation by an X-ray beam. (b) Persistent luminescence emission spectra recorded at 6 min decay after the stoppage of X-ray irradiation.

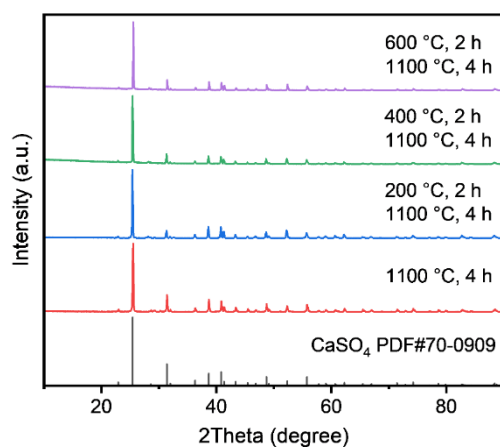

**Fig. S3** XRD patterns of the CaSO<sub>4</sub>:1%Pr<sup>3+</sup> phosphor sintered at 1100 °C in the absence and presence of pre-firing at different temperatures.

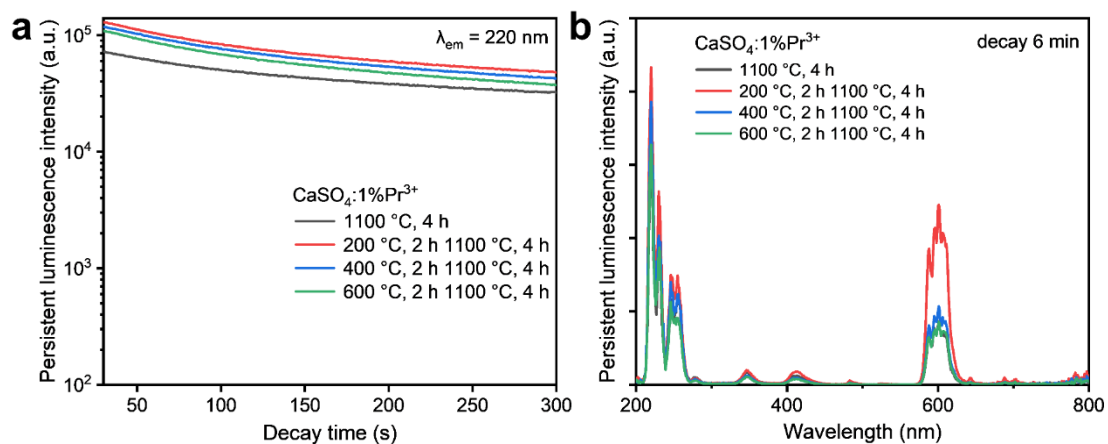

**Fig. S4** (a) Far-UVC persistent luminescence decay curves of the  $\text{CaSO}_4:1\%\text{Pr}^{3+}$  phosphor sintered at 1100 °C in the absence and presence of pre-firing at different temperatures monitored at 220 nm after irradiation by an X-ray beam. (b) Persistent luminescence emission spectra recorded at 6 min decay after stopping X-ray irradiation.

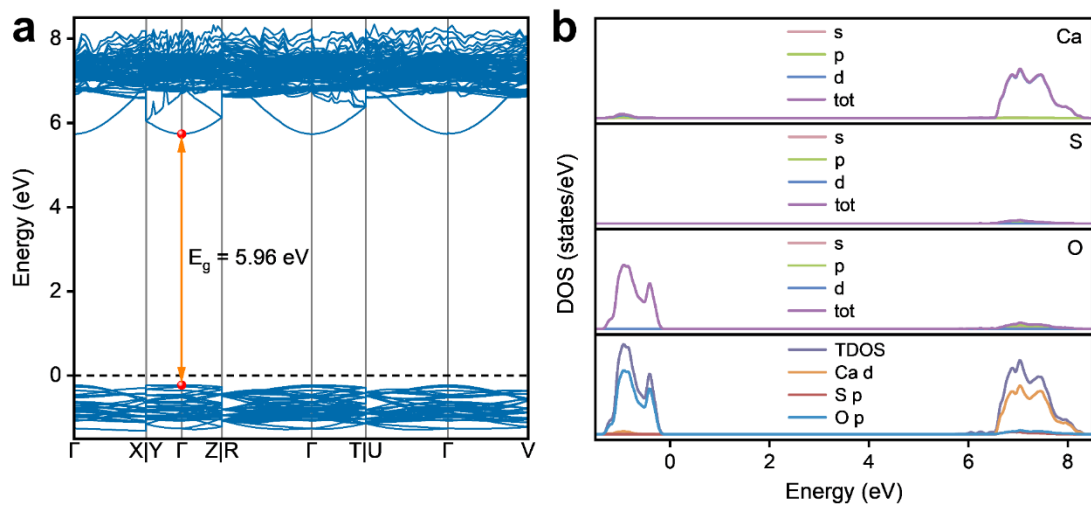

**Fig. S5** (a) Band structure and (b) total DOS and partial DOS of the  $\text{CaSO}_4$  host.

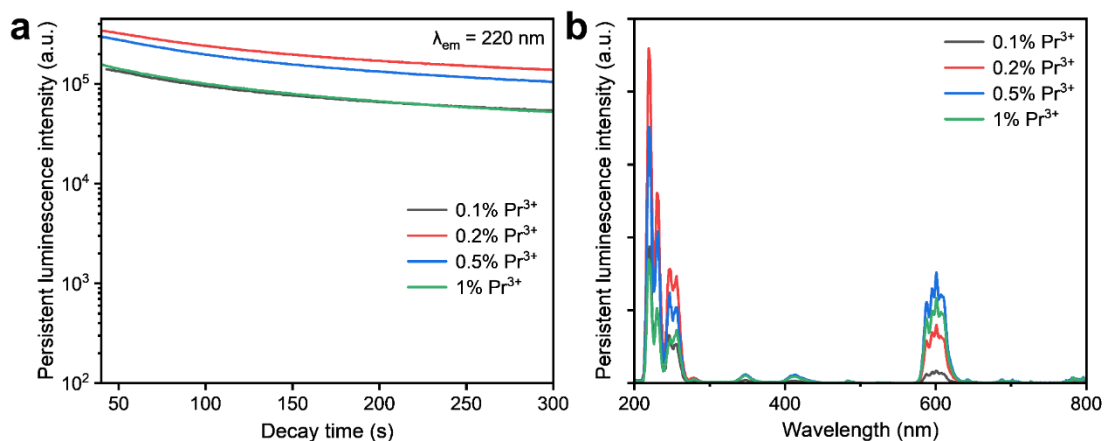

**Fig. S6** (a) Concentration-dependent persistent luminescence decay curves of the  $\text{CaSO}_4:x\% \text{Pr}^{3+}$  ( $x = 0.1, 0.2, 0.5, \text{ and } 1$ ) phosphors monitored at 220 nm in the dark after irradiation with an X-ray tube for 5 min (dose rate: 208.20 mGy/s). (b) Concentration-dependent persistent luminescence emission spectra recorded at 6 min decay after ceasing X-ray irradiation.

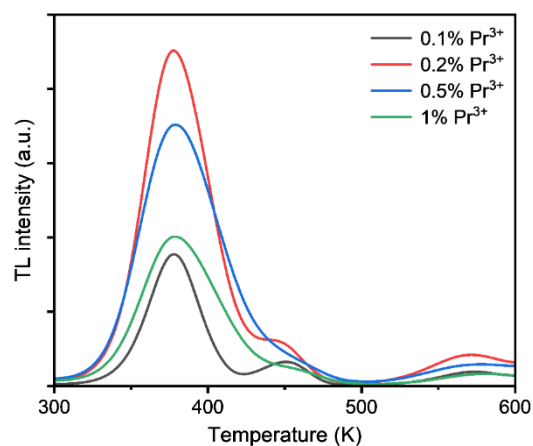

**Fig. S7** TL curves of the  $\text{CaSO}_4:x\% \text{Pr}^{3+}$  ( $x = 0.1, 0.2, 0.5,$  and  $1$ ) phosphors after irradiation with an X-ray tube for 5 min (dose rate: 208.20 mGy/s). TL curves were acquired after 1 min decay.



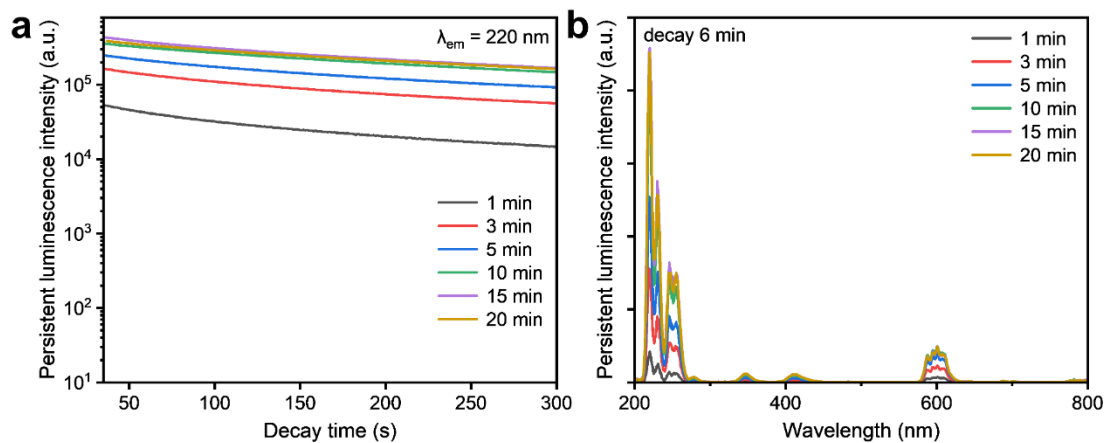

**Fig. S8** (a) Persistent luminescence decay curves of the  $\text{CaSO}_4:0.2\%\text{Pr}^{3+}$  phosphor monitored at 220 nm in the dark by varying the X-ray irradiation time (dose rate: 208.20 mGy/s). (b) Persistent luminescence emission spectra measured at 6 min decay after stopping X-ray irradiation.

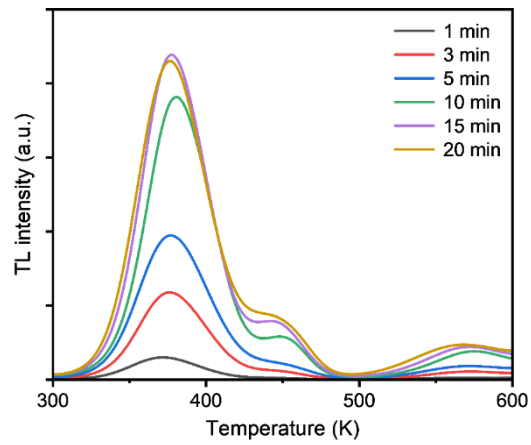

**Fig. S9** TL curves of the  $\text{CaSO}_4:0.2\%\text{Pr}^{3+}$  phosphor with varying the excitation duration from 1 to 20 min (dose rate: 208.20 mGy/s). TL curves were obtained after 1 min decay.

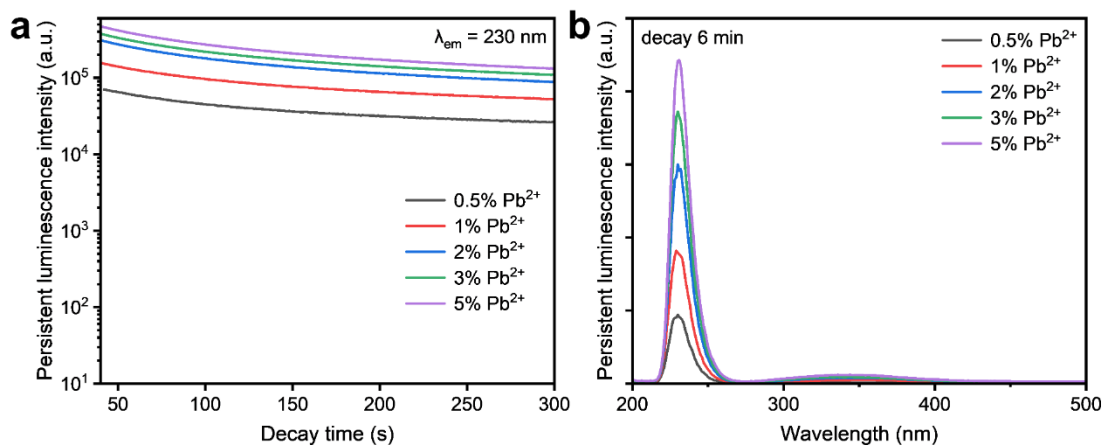

**Fig. S10** (a) Concentration-dependent afterglow decay curves of the  $\text{CaSO}_4:x\%\text{Pb}^{2+}$  ( $x = 0.5, 1, 2, 3$  and  $5$ ) phosphors monitored at  $230 \text{ nm}$  in the dark after irradiation with an X-ray tube for  $3 \text{ min}$  (dose rate:  $290.30 \text{ mGy/s}$ ). (b) Concentration-dependent afterglow emission spectra recorded at  $6 \text{ min}$  decay after the stoppage of X-ray irradiation.

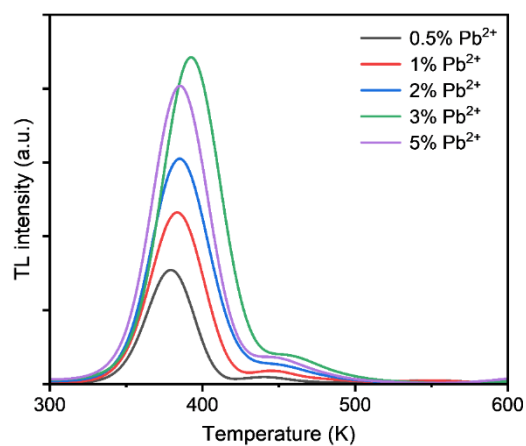

**Fig. S11** TL curves of the  $\text{CaSO}_4:x\%\text{Pb}^{2+}$  ( $x = 0.5, 1, 2, 3$  and  $5$ ) phosphors after irradiation with an X-ray tube for 3 min (dose rate: 290.30 mGy/s). TL curves were obtained after 1 min decay.

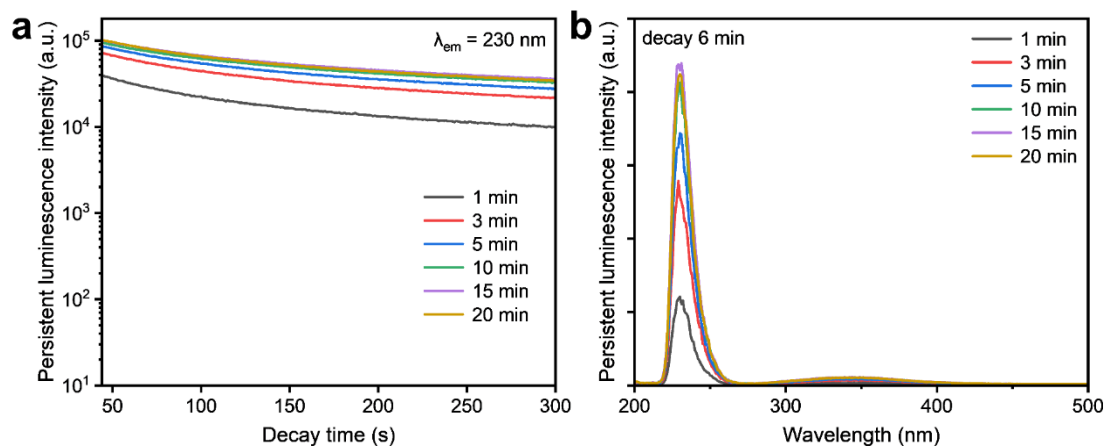

**Fig. S12** (a) Persistent luminescence decay curves of the  $\text{CaSO}_4:3\%\text{Pb}^{2+}$  phosphor monitored at 230 nm in the dark by varying the X-ray irradiation time (dose rate: 290.30 mGy/s). (b) Persistent luminescence emission spectra obtained at 6 min decay after ceasing X-ray irradiation.

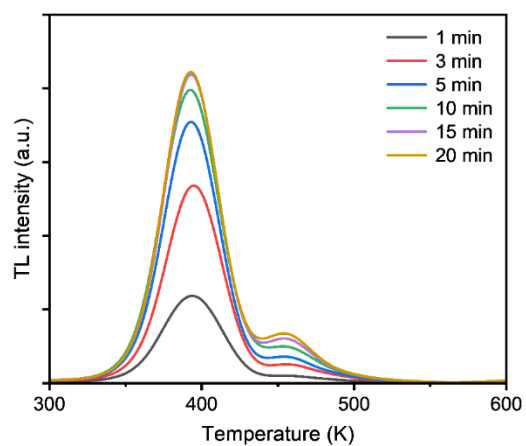

**Fig. S13** TL curves of the  $\text{CaSO}_4:3\%\text{Pb}^{2+}$  phosphor with varying the excitation duration from 1 to 20 min (dose rate: 290.30 mGy/s). TL curves were recorded after 1 min decay.

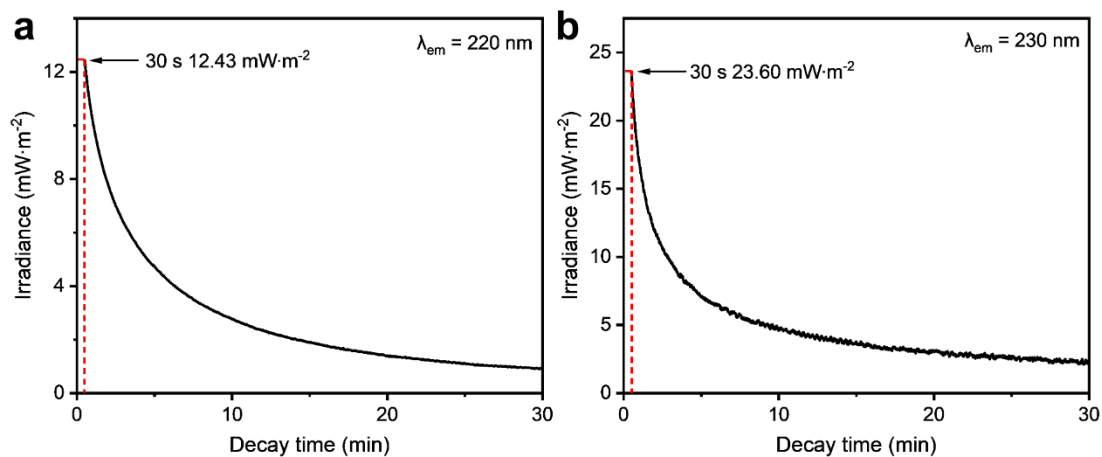

**Fig. S14** Far-UVC persistent luminescence power density decay curves of the pre-irradiated (a)  $\text{CaSO}_4:0.2\%\text{Pr}^{3+}$  and (b)  $\text{CaSO}_4:3\%\text{Pb}^{2+}$  phosphors measured by Newport power meter.

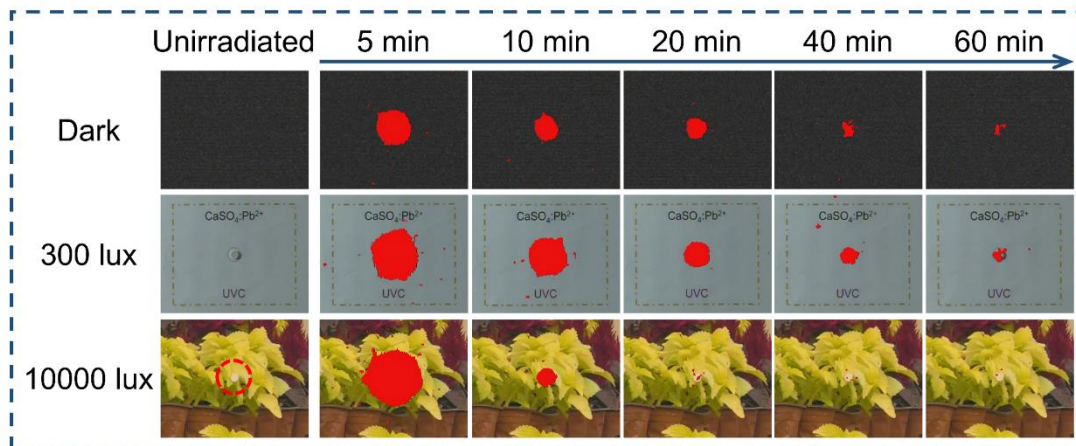

**Fig. S15** UVC persistent luminescence images of the charged  $\text{CaSO}_4:3\%\text{Pb}^{2+}$  phosphor disc at different decay instants in dark, in an indoor LED lighting environment (300 lux), and in an outdoor sunlight environment ( $\sim 10000$  lux), respectively. The phosphor disc was pre-irradiated by 290.30 mGy/s X-ray for 15 min.



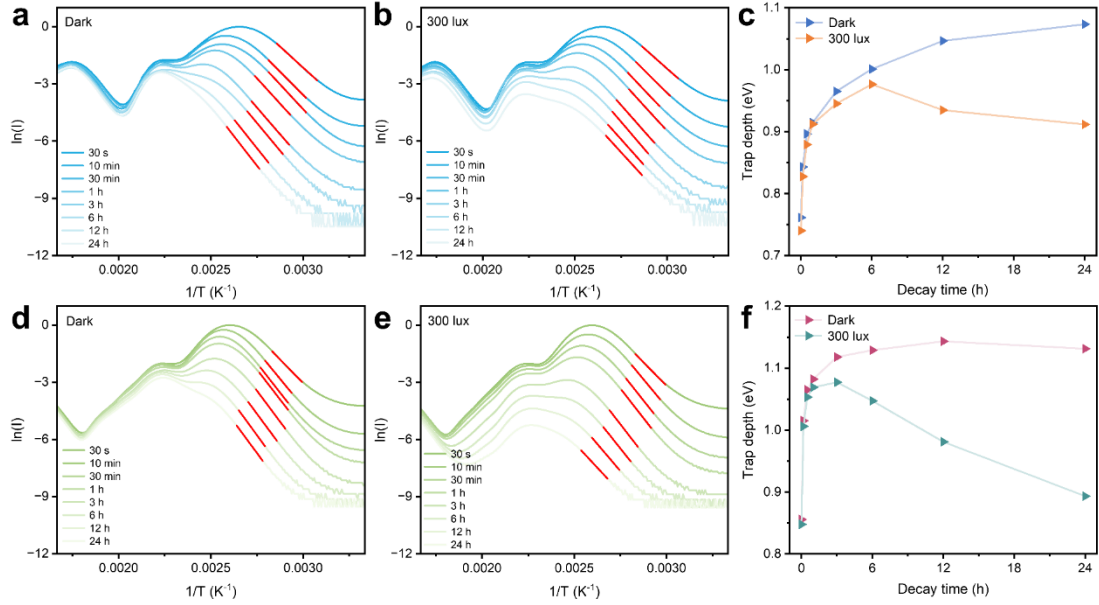

**Fig. S16** (a,b) Initial rising analysis for the TL curves of the pre-irradiated CaSO<sub>4</sub>:0.2%Pr<sup>3+</sup> phosphor at different decay instants in dark and bright (300 lux) indoor environments. (c) The depth of the shallowest occupied trap for each curve of the CaSO<sub>4</sub>:0.2%Pr<sup>3+</sup> phosphor was estimated according to the slope of fitting red straight line. (d,e) Initial rising analysis for the TL curves of the pre-irradiated CaSO<sub>4</sub>:3%Pb<sup>2+</sup> phosphor at different decay times in dark and bright (300 lux) indoor environments. (f) The depth of the shallowest occupied trap for each curve of the CaSO<sub>4</sub>:3%Pb<sup>2+</sup> phosphor was estimated according to the slope of fitting red straight line.

The initial rise method assumes that the initial low-temperature side of the TL peak adheres to the Arrhenius equation:

$$I = C \exp(-\Delta E/kT)$$

where  $I$  denotes the TL intensity,  $C$  is a fitting constant incorporating a frequency factor,  $\Delta E$  represents the trap depth,  $k$  is the Boltzmann constant, and  $T$  is the temperature. Based on this equation, the initial rise part of the glow curve is represented by a straight line with a slope of  $-\Delta E/k$  if  $\ln(I)$  is plotted as a function of  $1/T$ . The fittings of the selected glow curves are depicted by the red solid lines.

**Table S1** Rietveld refinement parameters of the  $\text{CaSO}_4:0.2\%\text{Pr}^{3+}$  and  $\text{CaSO}_4:3\%\text{Pb}^{2+}$  phosphors.

| Sample                    | $\text{CaSO}_4:0.2\%\text{Pr}^{3+}$ | $\text{CaSO}_4:3\%\text{Pb}^{2+}$ |
|---------------------------|-------------------------------------|-----------------------------------|
| Space group               | Bmmb (63)                           | Bmmb (63)                         |
| a (Å)                     | 6.99049(6)                          | 6.99071(5)                        |
| b (Å)                     | 6.99866(8)                          | 7.00146(11)                       |
| c (Å)                     | 6.24056(7)                          | 6.23985(7)                        |
| $\alpha=\beta=\gamma$ (°) | 90                                  | 90                                |
| Volume (Å <sup>3</sup> )  | 305.313(6)                          | 305.411(6)                        |
| $R_{wp}$                  | 9.75%                               | 10.90%                            |
| $R_p$                     | 6.72%                               | 7.63%                             |
| $\chi^2$                  | 2.65                                | 4.645                             |

**Table S2** Far-UVC persistent luminescence power intensities of the  $\text{CaSO}_4:0.2\%\text{Pr}^{3+}$  and  $\text{CaSO}_4:3\%\text{Pb}^{2+}$  phosphors measured by the power meter.

| Decay time (s) | $\text{CaSO}_4:0.2\%\text{Pr}^{3+}$<br>Irradiance<br>( $\text{mW}\cdot\text{m}^{-2}$ ) | $\text{CaSO}_4:3\%\text{Pb}^{2+}$<br>Irradiance<br>( $\text{mW}\cdot\text{m}^{-2}$ ) |
|----------------|----------------------------------------------------------------------------------------|--------------------------------------------------------------------------------------|
| 30             | 12.43                                                                                  | 23.60                                                                                |
| 60             | 10.21                                                                                  | 16.94                                                                                |
| 90             | 8.81                                                                                   | 13.72                                                                                |
| 120            | 7.80                                                                                   | 11.90                                                                                |
| 150            | 6.99                                                                                   | 10.68                                                                                |
| 300            | 4.73                                                                                   | 7.04                                                                                 |
| 600            | 2.77                                                                                   | 4.61                                                                                 |
| 900            | 1.89                                                                                   | 3.62                                                                                 |

**Table S3** Persistent luminescence irradiance comparison with the other reported UVC persistent phosphors.

| Material                                                           | Emission wavelength (nm) | Irradiance (mW m <sup>-2</sup> ) | Ref. (in text) |
|--------------------------------------------------------------------|--------------------------|----------------------------------|----------------|
| Ca <sub>2</sub> Al <sub>2</sub> SiO <sub>7</sub> :Pr <sup>3+</sup> | 268                      | 4.8 (10 s)                       | 9              |
| Sr <sub>2</sub> P <sub>2</sub> O <sub>7</sub> :Pr <sup>3+</sup>    | 222                      | 35.42 (30 s)                     | 29             |
| Cs <sub>2</sub> NaYF <sub>6</sub> :Pr <sup>3+</sup>                | 270                      | 14.9 (30 s)                      | 32             |
| Lu <sub>2</sub> SiO <sub>5</sub> :Pr <sup>3+</sup>                 | 270                      | 6.98 (15 s)                      | 34             |
| LiLuSiO <sub>4</sub> :Pr <sup>3+</sup>                             | 280                      | 12.47 (10 s)                     | 35             |
| CaSO <sub>4</sub> :Pr <sup>3+</sup>                                | 220                      | 12.43 (30 s)                     | This work      |
| CaSO <sub>4</sub> :Pb <sup>2+</sup>                                | 230                      | 23.60 (30 s)                     | This work      |
